# Supplementary material
Source: MDPI journal article supplement (https://www.mdpi.com/2076-3271/11/1/19)
Supplement: s1 [file s1]

A

glucocorticoid  
receptor

p-S6

p-4E-BP1

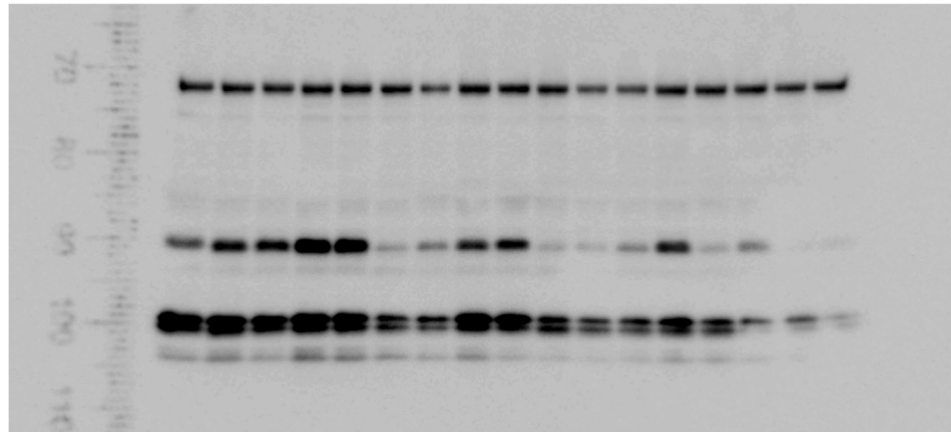

B

tubulin

GAPDH

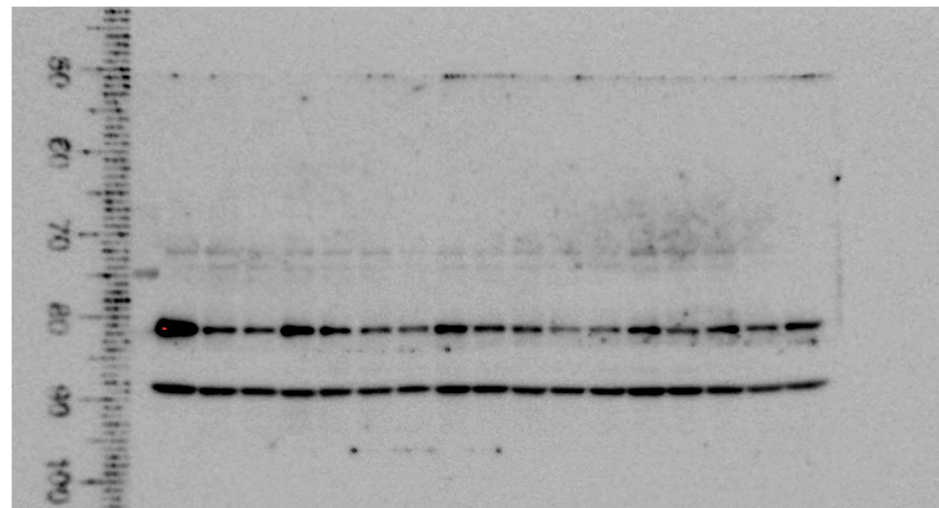

Figure S1. Western blot analysis in all mice. These are supplemental data for Figure 4B. (A) Phosphorylation of S6 and 4E-BP1. (B) Internal control. Lane 2-9: control group and Lane 10 – 17: WRS group. We used lane 8-11 for Figure 4B.
